# Supplementary material for: A Novel Heat Shock Transcription Factor (ZmHsf08) Negatively Regulates Salt and Drought Stress Responses in Maize
Source: MDPI journal article supplement (doi:10.3390/ijms222111922), 2021-11-03
Supplement: s1 [file s1]

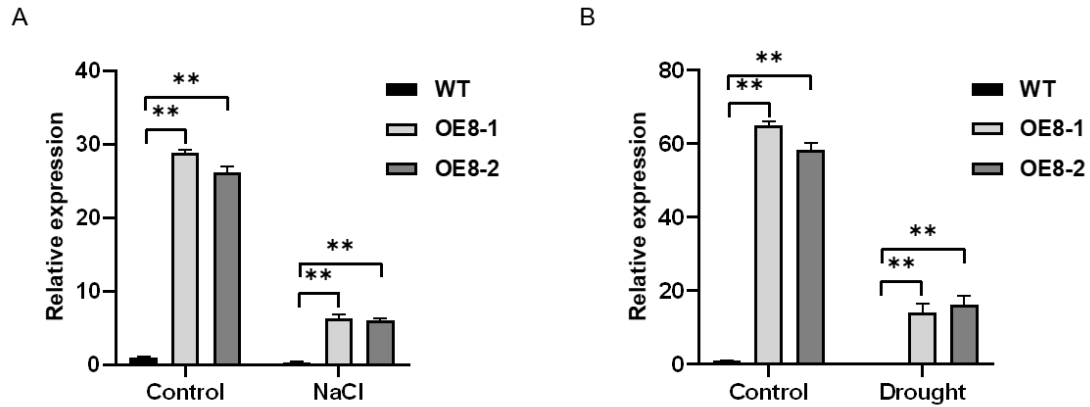

**Figure S1:** The expression level of *ZmHsf08* in transgenic maize under salt- and drought-stress. A, Relative expression level of *ZmHsf08* in WT and transgenic lines under normal condition and salt treatment for 7 days. B, Relative expression level of *ZmHsf08* in WT and transgenic lines under normal condition and drought treatment for 7 days. Values are means  $\pm$  SD. Bars represent means  $\pm$  SD (n = 3 repeats). Significant differences (Student's t test): \*,  $P < 0.05$ , \*\*,  $P < 0.01$ .

**Table S1:** Primers for vector construction.

| Vector name     | Primer names | Primer sequences (5'-3')                  |
|-----------------|--------------|-------------------------------------------|
| ZmHsf08-GFP     | GFP-F        | GGactagtATGGTGGAGGAAGGCGCC                |
|                 | GFP-R        | CGCggatccATTCCCGCCGCCGCA                  |
| GFP-ZmHsf08     | DC-F         | gatgaactatacaaaggcgcgccAATGGTGGAGGAAGGCGC |
|                 | DC-R         | cgatcggggaaattcgagctcTTAATTCCCGCCGCCGCA   |
| ZmHsf08-AD      | AD-F         | gccatggaggccagtgaattcATGGTGGAGGAAGGCGCC   |
|                 | AD-R         | atgccaccgggtggaattcTTAATTCCCGCCGCCGCA     |
| ZmHsf08-BD      | BD-F         | atggccatggaggccgaattcATGGTGGAGGAAGGCGCC   |
|                 | BD-R         | tcgacggatccccgggaattcTTAATTCCCGCCGCCGCA   |
| Hsf08-cYFP/nYFP | YFP-F        | GctctagaATGGTGGAGGAAGGCGCC                |
|                 | YFP-R        | CGCggatccATTCCCGCCGCCGCA                  |

**Table S2:** Primers for RT-qPCR

| Gene name     | Primer names | Primer sequences (5'-3') |
|---------------|--------------|--------------------------|
| GRMZM2G002131 | ZmHsf08-qF   | TTGAAGCCTCTGACATCTC      |
|               | ZmHsf08-qR   | AACCATCACCACCATCTG       |
| GRMZM2G006745 | ZmDREB2A-qF  | TTGAAGCCTCTGACATCTC      |
|               | ZmDREB2A-qR  | AACCATCACCACCATCTG       |
| GRMZM2G172230 | ZmERD1-qF    | CACGATACTGATGGACAT       |
|               | ZmERD1-qR    | CCTAATCTACTACACTGGAA     |

---

|               |            |                            |
|---------------|------------|----------------------------|
| GRMZM2G479760 | ZmABF2-qF  | TTGTGCCTCCACTGCAATTCGG     |
|               | ZmABF2-qR  | TTACAAGTCGTCTCCCTCCATCTTCC |
| GRMZM2G098750 | ZmRAB18-qF | GTGGTGGGTTGAGGGGAAGGAAGC   |
|               | ZmRAB18-qR | ACGCCATCGCCGTTGAGCCT       |
| GRMZM5G838285 | ZmNCED-qF  | CTTTGAGACTTTCCGAGCAG       |
|               | ZmNCED-qR  | AGGGAGGATAGGAAGGTAAACA     |
| GRMZM2G379053 | ZmZEP-qF   | TTGGTTGGTGCCGATGGAAT       |
|               | ZmZEP-qR   | CGTATCGATATCGGGCAGCA       |
| GRMZM2G704021 | ZmLEA2-qF  | GTCGAGGACGCGATGTACC        |
|               | ZmLEA2-qR  | ATTCTCCCCTTGACCGGGAT       |
| GRMZM2G342685 | ZmRD20-qF  | CTCCTTTGCTGTCCATCCGT       |
|               | ZmRD20-qR  | TGAGCTCAACTCGTCTTTTGTT     |
| GRMZM2G118019 | ZmNHX3-qF  | GCCTGGTGTTTGGAGAAGGA       |
|               | ZmNHX3-qR  | GGACAGTGCTGGTTGCAAAG       |

---
